# Supplementary material for: Significant anti-inflammatory aziridine-containing indole alkaloids from the Chinese medicinal plant Alstonia scholaris
Source: Royal Society of Chemistry journal article supplement (doi:10.1039/d2cc07029d), 2023-01-01
Supplement: d2cc07029d1.pdf [file d2cc07029d1.pdf]

**Raw images of western blot**

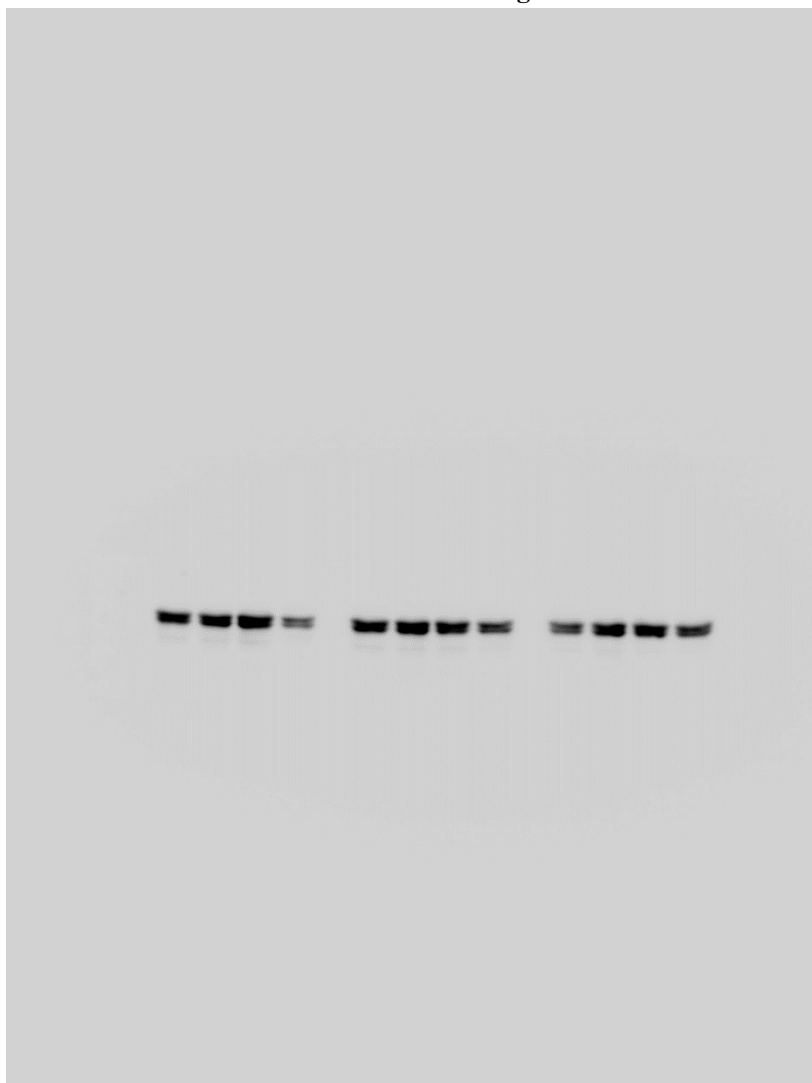

Figure 1. Raw image of Casepase-1

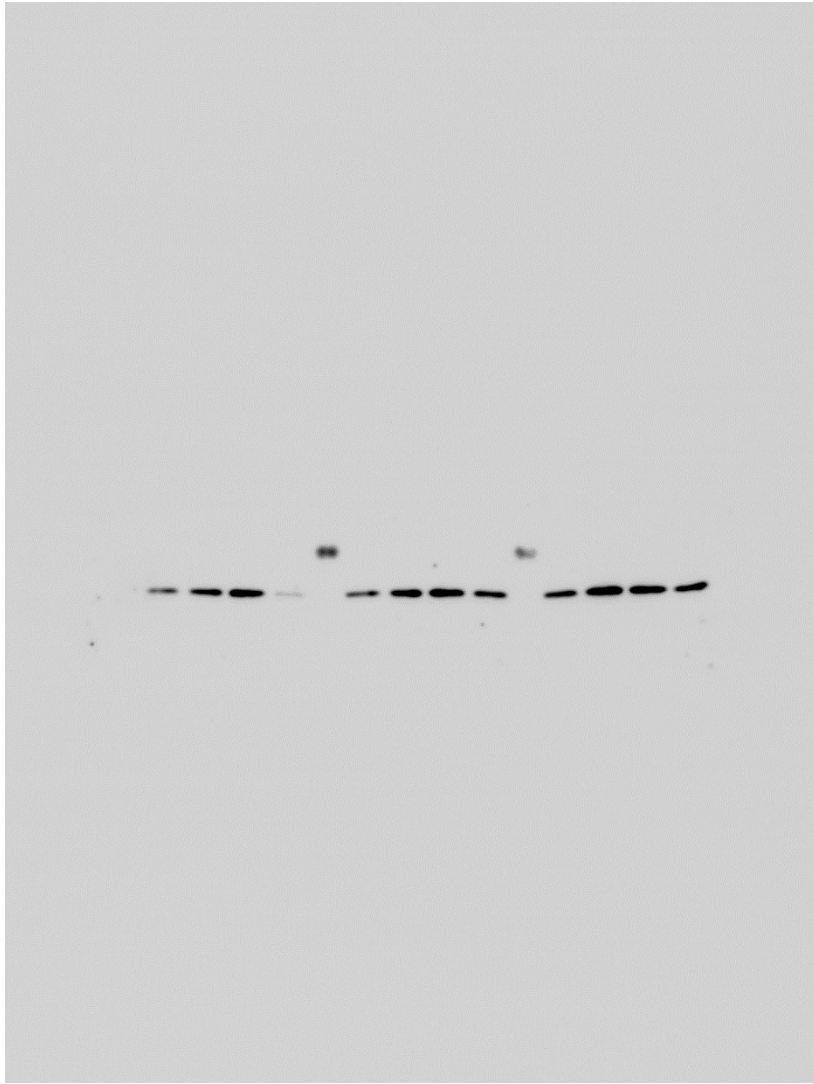

Figure 2. Raw image of IL-18

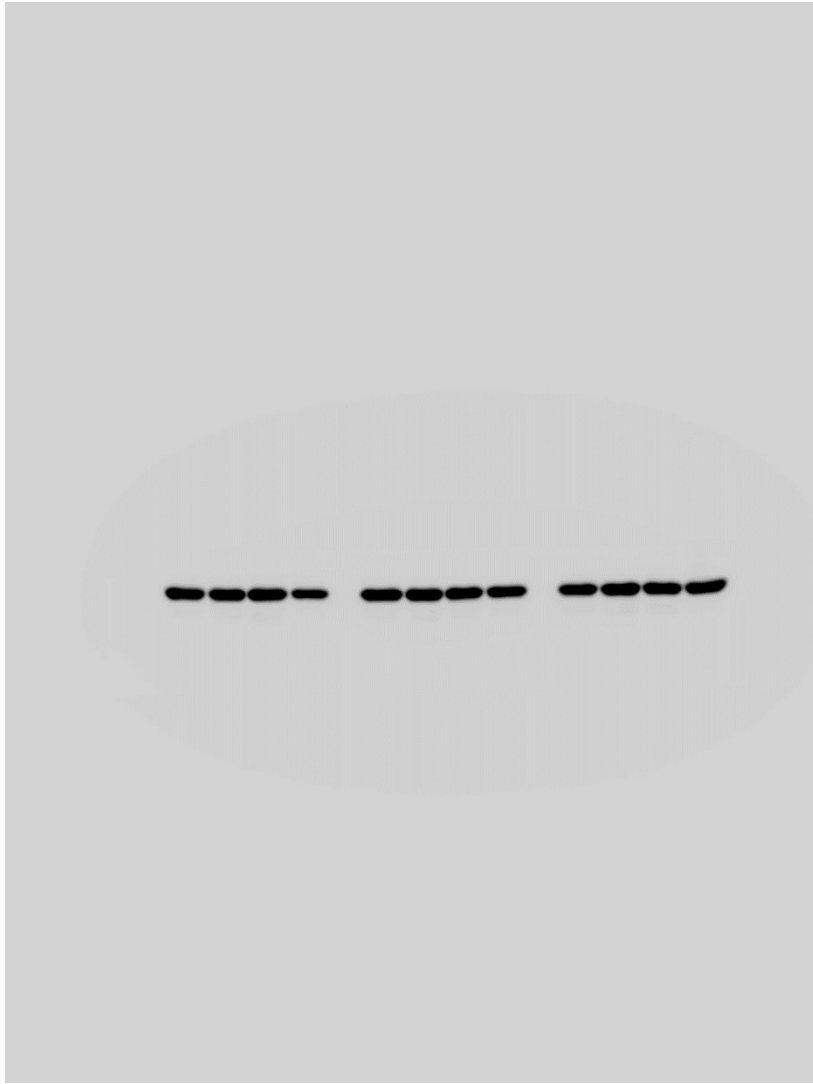

Figure 3. Raw image of  $\beta$ -tubulin

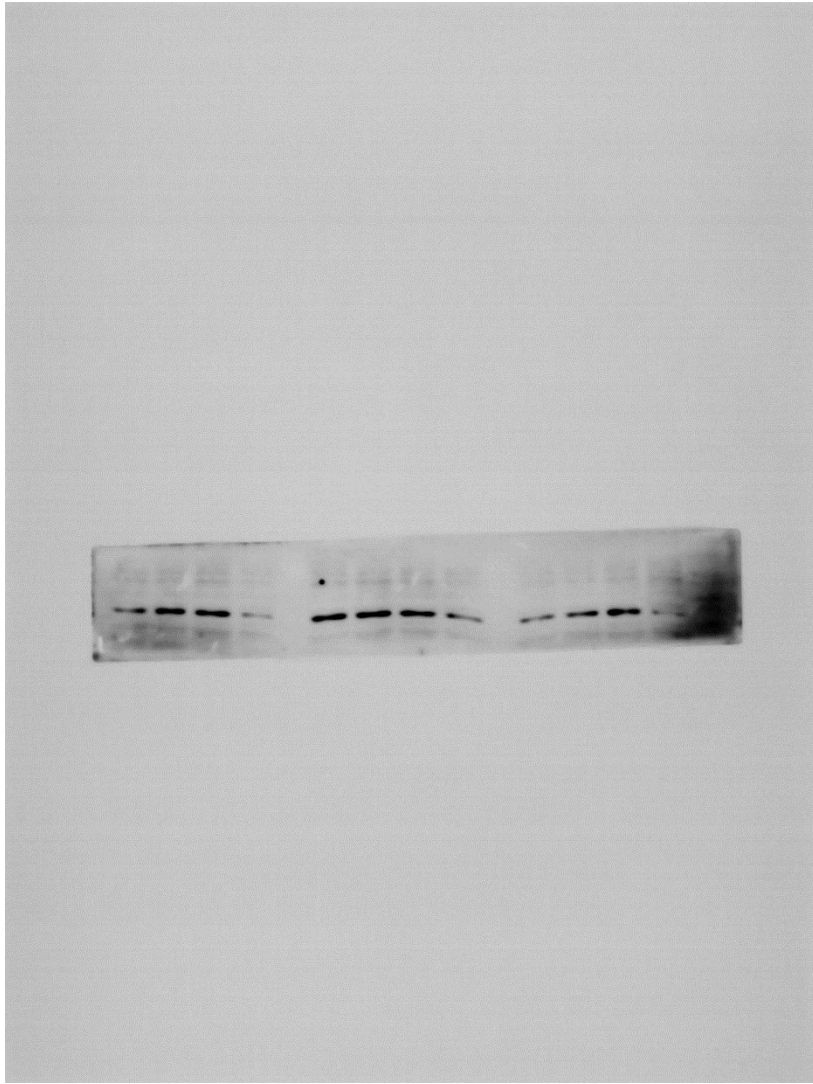

Figure 4. Raw image of P-p65

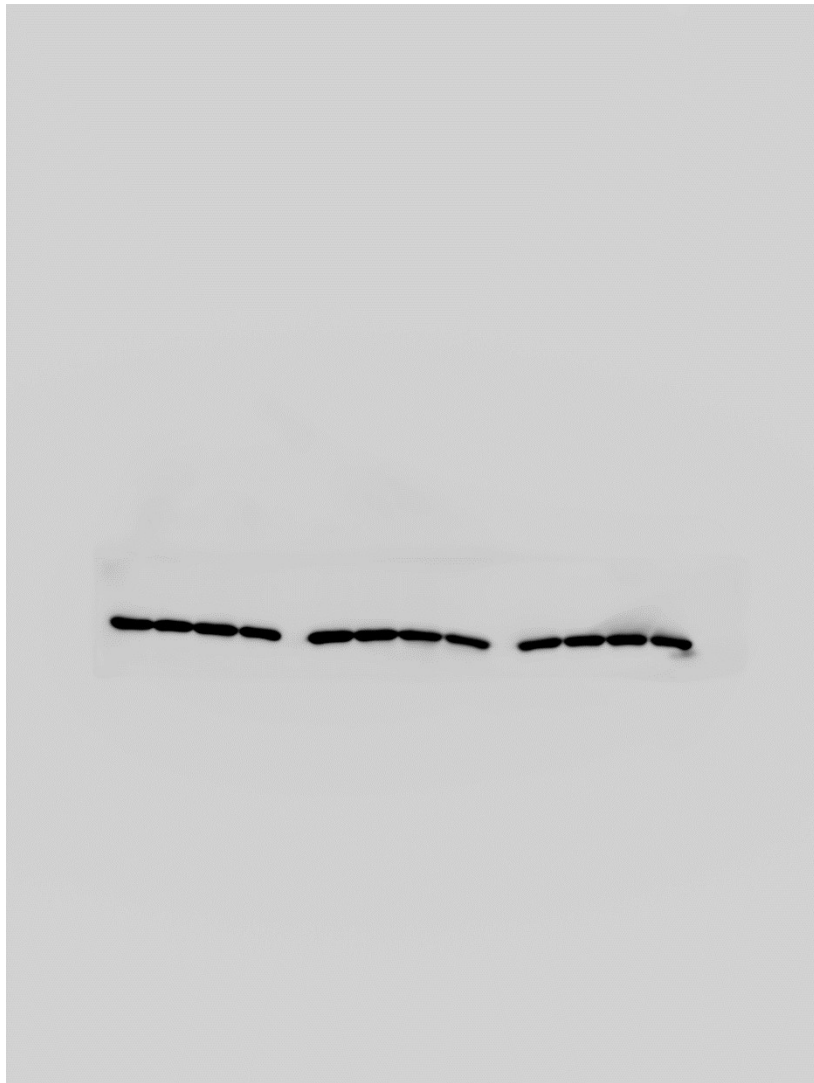

Figure 5. Raw image of  $\beta$ -tubulin
